# Supplementary material for: Interprofessional Collaboration and Diabetes Management in Primary Care: A Systematic Review and Meta-Analysis of Patient-Reported Outcomes
Source: MDPI journal article supplement (doi:10.3390/jpm12040643), 2022-04-15
Supplement: s1 [file s1]

## **Interprofessional Collaboration and Diabetes Management in primary care: a Systematic review and Meta-analysis of Patient-Reported Outcomes**

### **Search strategy**

("Diabetes Mellitus, Type 2" OR "diabetes mellitus type 2" OR "DM 2" OR "DM II" OR "diabetes mellitus 2" OR "diabetes mellitus II" ) AND  
((( "Interprofession" OR "interprofessional" OR "inter-professional" OR "interdisciplinary" OR "interdisciplinar" OR "inter-disciplinary" OR  
"interinstitutional" OR "intersector" OR "inter sector" OR "intersectoral" OR "cross-sectoral" OR "interorganization" OR "interorganizational"  
OR "inter-organization" OR "inter-organizational" OR "interorganitation" OR "interorganitational" OR "multiprofessional" OR "multi-profession"  
OR "multi-professional" OR "multidiscipline" OR "multidisciplinary" OR "interpersonal" OR "transprofession" OR "transprofessional" )  
AND ( "collaboration" OR "collaborative" OR "practice" OR "care" OR "care service" OR "relation" OR "relations" OR "relationship" OR "team"  
OR "teams" OR "teamwork" OR "team care" OR "approach" OR "program" OR "programs" OR "intervention" OR "behavior" OR  
"communication" OR "cooperation" OR "participation" OR "work" OR "working" OR "management" OR "evaluation" OR "treatment" ))  
OR ( "doctor nurse relationship" OR "practice nurse-GP team" OR "interprofessional collaboration" OR "IPC" OR "interdisciplinary collaboration"  
OR "intersectoral collaboration" OR "multiprofessional collaboration" OR "multidisciplinary collaboration" OR "transprofessional collaboration"  
OR "collaborative practice" OR "collaborative care" OR "interprofessional team" OR "interdisciplinary team" OR "multiprofessional team" OR  
"multidisciplinary team" OR "transprofessional team" )) AND  
("patient reported outcome measures" OR "PROM" OR "PROMs" OR "PROs" OR "patient reported outcomes" OR "patient reported outcome" OR  
"patient reported outcome measure" OR "health related quality of life" OR "HRQOL" OR "quality of life")

**Table S1.** Summary characteristics of the included studies

| Author, Year, Country               | Source                                                         | Intervention team                                                                                                              | Setting                  | Type of Interventions                                                                                             | Target of Intervention | Population                                      | Follow-up | PROMs Analyzed                                      | Results                                                                                                                                                                                                                                                                                                            |
|-------------------------------------|----------------------------------------------------------------|--------------------------------------------------------------------------------------------------------------------------------|--------------------------|-------------------------------------------------------------------------------------------------------------------|------------------------|-------------------------------------------------|-----------|-----------------------------------------------------|--------------------------------------------------------------------------------------------------------------------------------------------------------------------------------------------------------------------------------------------------------------------------------------------------------------------|
| Thankappan K.R. 2018, India         | PLoS Medicine                                                  | - Nurse with a PhD in public health<br>- Medical Social Worker<br>- Trained lay people                                         | Outpatient clinics       | - Community engagement<br>- Peer support                                                                          | Community-based        | - 500 intervention group<br>- 507 control group | 24 months | - SF-36 converted in Short Form 6 Dimension (SF-6D) | A community-based program didn't result in a nonsignificant reduction in diabetes incidence. However, there were significant improvements in some cardiovascular risk factors and physical functioning score of the HRQoL scale.                                                                                   |
| Penckofer S.M. 2012, USA            | Annals of Behavioral Medicine                                  | - Nurse<br>- Nurse trained by psychologist<br>- Psychologist                                                                   | Outpatient clinics       | - Psychological (psychoeducational)                                                                               | Group-based            | - 38 intervention group<br>- 36 control group   | 6 months  | - SF-12<br>- CES-D<br>- QLI Diabetes version        | SWEEP program provides evidence that group-therapy was more effective than usual care for treating depressed women with type 2 diabetes.                                                                                                                                                                           |
| Chaveepojnkamjorn W. 2009, Thailand | Southeast Asian Journal of Tropical Medicine and Public Health | - Psychologist<br>- Diabetologist                                                                                              | Community Health Centers | - Educational (self-management)<br>- Empowerment-based<br>- Psychological (health belief model)<br>- Peer support | Group-based            | - 80 intervention group<br>- 84 control group   | 6 months  | - WHOQOL-BREF (THAI version)                        | This program, focused on enhancement of experience sharing among group members and participation in problem-solving, shows it is effective for improving perceived quality of life.                                                                                                                                |
| Piette J.D. 2011, USA               | Medical Care                                                   | - Nurses with psychiatric and primary care training and experience, trained in CBT<br>- Experienced CBT supervisor and trainer | Primary Care Clinics     | - Psychological (Cognitive-Behavioural Therapy)<br>- Telemedicine                                                 | Person-based           | - 172 intervention group<br>- 177 control group | 12 months | - SF-12<br>- BDI                                    | This program of telephone delivered CBT combined with a pedometer-based walking program did not improve A1c values but significantly decreased patients' blood pressure, increased physical activity, and decreased depressive symptoms. The intervention also improved patients' functioning and quality of life. |

|                                 |                           |                                                                             |                                          |                                                                                 |                 |                                                 |           |                                           |                                                                                                                                                                                                                                           |
|---------------------------------|---------------------------|-----------------------------------------------------------------------------|------------------------------------------|---------------------------------------------------------------------------------|-----------------|-------------------------------------------------|-----------|-------------------------------------------|-------------------------------------------------------------------------------------------------------------------------------------------------------------------------------------------------------------------------------------------|
| Cezaretto A 2012, Brazil        | Quality of Life Research  | -Endocrinologist<br>- Psychologist<br>- Nutritionist<br>- Physical Educator | Primary Care Clinics                     | - Psychological (psychoeducational)                                             | Person-based    | - 97 intervention group<br>- 90 control group   | 9 months  | - SF-36<br>- BDI                          | An intensive intervention on lifestyle with interdisciplinary approach for individuals at risk for type 2DM induced greater improvements in QoL than a traditional one, in parallel to better benefits on cardiometabolic profile.        |
| Miklavcic J.J. 2020, Canada     | BMC Geriatrics            | - Nurse<br>- Dietitian<br>- Program Coordinator                             | Primary Care Clinics                     | - Educational (self-management)<br>- Community engagement                       | Community-based | - 70 intervention group<br>- 62 control group   | 6 months  | - SF-12<br>- CES-D<br>- SEM-CD<br>- SDSCA | This pragmatic trial of a self-management intervention for older adults with T2DM and multimorbidity demonstrated inconclusive results for improving QoL.                                                                                 |
| Blackberry I.D. 2013, Australia | BMJ Online                | - Practice nurses<br>- General Practitioner                                 | General practices                        | - Psychological (coaching)<br>- Telemedicine<br>- Educational (self-management) | Person-based    | - 30 intervention group<br>- 29 control group   | 18 months | - AQoL<br>- PHQ-9<br>- DSES               | A telephone coaching by existing generalist practice nurses without prescribing rights found no evidence that was effective compared with usual primary care, either in reaching treatment targets or achieving more intensive treatment. |
| Du Pon E. 2019, Netherlands     | BMC Endocrine Disorders   | - Practice Nurses<br>- Dieticians specialized in diabetes care              | General practices                        | - Educational (self-management)                                                 | Group-based     | - 101 intervention group<br>- 100 control group | 12 months | - EQ-5D-3L                                | PRISMA did not improve self-reported outcomes in patients with type 2 diabetes treated in primary care. It was not possible to make a statement about the clinical effects.                                                               |
| Vadstrup E.S. 2011, Denmark     | Health Qual Life Outcomes | - Nurse<br>- Physiotherapist<br>- Podiatrist<br>- Dietician                 | Outpatient Clinics and General Practices | - Educational (self-management)<br>- Empowerment-based approach                 | Group-based     | - 70 intervention group<br>- 73 control group   | 6 months  | - SF-36                                   | After 6 months this study suggests that a group-based rehabilitation programme is not superior to an individual counselling programme in changing patients' HRQOL and self-rated health.                                                  |

|                             |                                               |                                                                                      |                    |                                                               |              |                                                 |           |                  |                                                                                                                                                                                                                                                                                                                                             |
|-----------------------------|-----------------------------------------------|--------------------------------------------------------------------------------------|--------------------|---------------------------------------------------------------|--------------|-------------------------------------------------|-----------|------------------|---------------------------------------------------------------------------------------------------------------------------------------------------------------------------------------------------------------------------------------------------------------------------------------------------------------------------------------------|
| Pauley T. 2016, Canada      | Home Health Care Services Quarterly           | - Nurse<br>- Personal Support Worker                                                 | Home               | - Psychological (coaching)<br>- Educational (self-management) | Person-based | - 47 intervention group<br>- 47 control group   | 1 month   | - DSES<br>- HADS | A PSW-led coaching intervention to improve diabetes self-efficacy shows no differences compared to nurse-led traditional standard of care. However, the results do demonstrate it may be sufficient to improve depression. Furthermore all subjects demonstrated significant improvements in self-efficacy measures.                        |
| Siaw M.Y.L. 2017, Singapore | Journal of Clinical Pharmacy and Therapeutics | - Physicians<br>- Diabetes Nurse educators<br>- Dietitians<br>- Clinical pharmacists | Outpatient clinics | - Medication control<br>- Educational (self-management)       | Person-based | - 214 intervention group<br>- 197 control group | 6 months  | - DTSQ<br>- PAID | After 6 months a multidisciplinary collaborative care for Asian diabetic patients there was an increased QoL and satisfaction towards diabetes care, lightened the physicians' workload and cost saving. This study shows the effectiveness of this approach through an improvement of positive clinical, humanistic and economic outcomes. |
| Kulzer B. 2018, Germany     | Diabetes Research and Clinical Practice       | - Physicians received training based on a structured curriculum<br>- Medical staff   | General practices  | - Educational (self-management)                               | Person-based | - 440 intervention group<br>- 467 control group | 12 months | - DTSQ           | The iPDM process improved the use of diagnostic data leading to better glycemic control, more timely treatment adjustments (indicating reduced clinical inertia), and increased patient adherence and treatment satisfaction among patients and physicians.                                                                                 |

|                                   |                                            |                                                                                                                                                                                                  |                          |                                                                                                                                                                                                         |                                 |                                                                                                         |           |                                                                                                               |                                                                                                                                                                                                                                                             |
|-----------------------------------|--------------------------------------------|--------------------------------------------------------------------------------------------------------------------------------------------------------------------------------------------------|--------------------------|---------------------------------------------------------------------------------------------------------------------------------------------------------------------------------------------------------|---------------------------------|---------------------------------------------------------------------------------------------------------|-----------|---------------------------------------------------------------------------------------------------------------|-------------------------------------------------------------------------------------------------------------------------------------------------------------------------------------------------------------------------------------------------------------|
| Browning C. 2016, China           | BMJ Open                                   | <ul style="list-style-type: none"> <li>- Community Doctors trained in coaching</li> <li>- Community Nurses trained in coaching</li> <li>- Community psychologists trained in coaching</li> </ul> | Community health Centers | <ul style="list-style-type: none"> <li>- Psychological (health coaching - motivational intervention)</li> </ul>                                                                                         | Person-based                    | <ul style="list-style-type: none"> <li>- 372 intervention group</li> <li>- 339 control group</li> </ul> | 12 months | <ul style="list-style-type: none"> <li>- SDSCA</li> <li>- CDMSES</li> </ul>                                   | In this study, although a differential treatment effect was not observed for HbA1c, numerous outcomes (including HbA1c) improved in both groups, supporting the establishment of regular, free clinical health checks for people with T2DM in Chinese CHSs. |
| Markle-Reid M. 2017, Canada       | Journal of the American Geriatrics Society | <ul style="list-style-type: none"> <li>- Nurse</li> <li>- Dietitian</li> <li>- Program Coordinator (PC) from a community partner</li> <li>- Peer volunteers</li> </ul>                           | Primary Care Clinics     | <ul style="list-style-type: none"> <li>- Educational (self-management)</li> <li>- Psychological (health coaching - motivational intervention)</li> <li>- Individual and community engagement</li> </ul> | Community-based and Group-based | <ul style="list-style-type: none"> <li>- 80 intervention group</li> <li>- 79 control group</li> </ul>   | 6 months  | <ul style="list-style-type: none"> <li>- SF-12</li> <li>- SDSCA</li> <li>- CES-D</li> <li>- SEM-CD</li> </ul> | This study provide evidence that participation in a 6-month community-based intervention improved quality of life and self-management and reduced depressive symptoms in older adults with T2DM and comorbidity without increasing total healthcare costs.  |
| van der Wulp I. 2012, Netherlands | Diabetic Medicine                          | <ul style="list-style-type: none"> <li>- Expert patients trained in motivational interviewing</li> <li>- General Practitioner</li> <li>- Dieticians</li> </ul>                                   | General practices        | <ul style="list-style-type: none"> <li>- Peer support</li> <li>- Psychological (self-management coaching)</li> <li>- Patient engagement</li> </ul>                                                      | Person-based                    | <ul style="list-style-type: none"> <li>- 59 intervention group</li> <li>- 60 control group</li> </ul>   | 6 months  | <ul style="list-style-type: none"> <li>- CES-D</li> <li>- DMSES</li> <li>- PAID</li> </ul>                    | A peer-led self-management coaching programme for recently diagnosed patients with Type 2 diabetes improved self-efficacy of patients experiencing low self-efficacy shortly after diagnosis                                                                |
| Davies M.J. 2008, UK              | BMJ                                        | <ul style="list-style-type: none"> <li>- Dieticians</li> <li>- Practice Nurses</li> <li>- Nurse specialists</li> </ul>                                                                           | General practices        | <ul style="list-style-type: none"> <li>- Educational</li> <li>- Patient empowerment</li> </ul>                                                                                                          | Group-based                     | <ul style="list-style-type: none"> <li>- 437 intervention group</li> <li>- 387 control group</li> </ul> | 12 months | <ul style="list-style-type: none"> <li>- WHOQOL-BREF</li> <li>- HADS</li> <li>- PAID</li> </ul>               | A structured group education programme for patients with newly diagnosed type 2 diabetes resulted in greater improvements in weight loss and smoking cessation and positive improvements in beliefs about illness but no difference in haemoglobin          |

|                             |                             |                                                                                             |                      |                                                |              |                                                 |           |                   |                                                                                                                                                                                                                                                                 |
|-----------------------------|-----------------------------|---------------------------------------------------------------------------------------------|----------------------|------------------------------------------------|--------------|-------------------------------------------------|-----------|-------------------|-----------------------------------------------------------------------------------------------------------------------------------------------------------------------------------------------------------------------------------------------------------------|
|                             |                             |                                                                                             |                      |                                                |              |                                                 |           |                   | A(1c) levels up to 12 months after diagnosis.                                                                                                                                                                                                                   |
| Cortez D.N. 2017, Brazil    | BMC Public Health           | - Lead researcher as a facilitator and an instigator of discussions<br>- Research assistant | Primary Care Clinics | - Educational<br>- Patient empowerment         | Group-based  | - 127 intervention group<br>- 111 control group | 12 months | - SLC             | The empowerment program based on individualized goals was effective in improving self-care practices and metabolic control of type 2 diabetes in Brazilian users                                                                                                |
| Kinmonth A.L. 1998, UK      | BMJ                         | - Nurse<br>- General Practitioner                                                           | General practices    | - Psychological                                | Person-based | - 142 intervention group<br>- 108 control group | 12 months | - ADDQoL          | A training programme in patient centred care for practitioners led to patients with newly diagnosed diabetes reporting better communication with doctors, greater wellbeing, and greater treatment satisfaction at one year, without loss of glycaemic control. |
| Lamers F. 2011, Netherlands | Journal of Advanced Nursing | - Nurses<br>- Psychiatrist<br>- General Practitioner<br>- Psychologist                      | General practices    | - Psychological (Cognitive Behavioral Therapy) | Person-based | - 105 intervention group<br>- 103 control group | 9 months  | - DSC-R<br>- PAID | The nurse-administered intervention had limited effects on diabetes-specific quality of life.                                                                                                                                                                   |

Abbreviations: SF-36, short form health survey 36; SF-12, short form health survey 12; CES-D, The Center for Epidemiologic Studies Depression Tool; QLI Diabetes version, Diabetes version of the Ferrans and Powers Quality of Life Index; WHOQOL-BREF (THAI version), Thai abbreviated version of World Health Organization Quality of Life; BDI, Beck Depression Inventory; SEM-CD, Self-Efficacy for Managing Chronic Disease scale; SDSCA, Summary of Diabetes Self-Care Activities scale; AQoL, Assessment of Quality of Life Mark 2 instrument; PHQ-9, Major depressive syndrome; DMSES, 20-item Diabetes Management Self-Efficacy Scale; DSES, Diabetes Self-Efficacy Scale; EQ-5D-3L, EuroQol Five Dimensions scale, HADS, Hospital Anxiety and Depression Scale; DTSQ, Diabetes Satisfaction and Treatment Questionnaire; PAID, Problem Areas in Diabetes questionnaire; WHOQOL-BREF, short version of the World Health Organization Quality of Life instrument; SLC, Self-care for type 2 diabetes; ADDQoL, audit of diabetes dependent quality of life; DSC-R, Diabetes Symptom Checklist – Revised.

**Table S2.** Results of quality assessment process of Controlled Intervention studies.

| Author, Year, Country               | 1   | 2   | 3   | 4   | 5   | 6   | 7   | 8   | 9   | 10  | 11  | 12  | 13  | 14  | Quality Rating |
|-------------------------------------|-----|-----|-----|-----|-----|-----|-----|-----|-----|-----|-----|-----|-----|-----|----------------|
| Thankappan K.R. 2018, India         | yes | yes | yes | yes | no  | yes | good           |
| Penckofer S.M. 2012, USA            | yes | yes | yes | no  | no  | yes | yes | yes | yes | NR  | yes | yes | yes | yes | good           |
| Chaveepojnkamjorn W. 2009, Thailand | yes | yes | yes | NR  | NR  | yes | yes | yes | yes | NR  | yes | yes | yes | NR  | fair           |
| Piette J.D. 2011, USA               | yes | yes | yes | NR  | NR  | yes | yes | yes | yes | NR  | yes | yes | yes | yes | good           |
| Cezaretto A 2012, Brazil            | yes | yes | NR  | NR  | NR  | yes | no  | yes | yes | NR  | yes | no  | yes | NR  | poor           |
| Markle-Reid M. 2017, Canada         | yes | yes | yes | no  | yes | yes | yes | yes | yes | NR  | yes | yes | yes | yes | good           |
| Miklavcic J.J. 2020, Canada         | yes | yes | yes | no  | yes | no  | yes | yes | yes | NR  | yes | yes | yes | yes | good           |
| Blackberry I.D. 2013, Australia     | yes | yes | yes | no  | yes | yes | yes | yes | yes | NR  | yes | yes | yes | NR  | good           |
| van der Wulp I. 2012, Netherlands   | yes | yes | yes | NR  | NR  | yes | yes | yes | yes | NR  | yes | yes | yes | NR  | fair           |
| Davies M.J. 2008, UK                | yes | yes | yes | NR  | NR  | yes | no  | yes | yes | NR  | yes | yes | yes | yes | fair           |
| Du Pon E. 2019, Netherlands         | yes | yes | yes | NR  | NR  | yes | yes | yes | yes | NR  | yes | yes | yes | yes | good           |
| Cortez D.N. 2017, Brazil            | yes | yes | yes | NR  | NR  | yes | yes | yes | yes | NR  | yes | yes | yes | NR  | fair           |
| Vadstrup E.S. 2011, Denmark         | yes | yes | yes | no  | yes | yes | yes | yes | yes | NR  | yes | yes | yes | yes | good           |
| Pauley T. 2016, Canada              | yes | yes | yes | no  | yes | yes | yes | yes | yes | NR  | yes | NR  | yes | yes | good           |
| Siaw M.Y.L. 2017, Singapore         | yes | yes | yes | NR  | NR  | yes | yes | no  | no  | NR  | yes | yes | yes | yes | fair           |
| Kulzer B. 2018, Germany             | yes | yes | yes | NR  | NR  | yes | yes | yes | yes | NR  | yes | yes | yes | yes | good           |
| Browning C. 2016, China             | yes | yes | yes | no  | yes | yes | yes | yes | yes | NR  | yes | yes | yes | NR  | good           |
| Kinmonth A.L. 1998, UK              | yes | yes | yes | no  | yes | yes | no  | yes | yes | NR  | yes | yes | yes | yes | good           |
| Lamers F. 2011, Netherlands         | yes | yes | yes | NR  | yes | yes | yes | no  | yes | NR  | yes | yes | yes | yes | good           |

Abbreviation: NR, not reported. Author-derived key for standardization:  $\leq 5$  POOR, 6-7 FAIR,  $\geq 8$  GOOD.
